# Supplementary material
Source: publisher site journal article supplement (https://www.dovepress.com/get_supplementary_file.php?f=413912.docx)
Supplement: Supplementary file 1 [file get_supplementary_file.php]

**Supplementary Table 1 Results of covariate screening by univariate COX analysis**

| Variables | HR (95% CI) | *P* |
| --- | --- | --- |
| Age | 1.03 (0.99-1.06) | 0.135 |
| Age |  |  |
| <45 | Ref |  |
| >=45 | 1.21 (0.48-3.05) | 0.672 |
| Gender |  |  |
| Male | Ref |  |
| Female | 0.62 (0.37-1.06) | 0.077 |
| Race |  |  |
| Mexican American | Ref |  |
| Other Hispanic | 0.43 (0.09-2.03) | 0.276 |
| Non-Hispanic White | 1.33 (0.54-3.28) | 0.524 |
| Non-Hispanic Black | 1.83 (0.71-4.74) | 0.205 |
| Other Race-including multi-racial | 0.49 (0.08-3.09) | 0.432 |
| Education level |  |  |
| Less than 9th grade | Ref |  |
| 9-11th grade | 0.84 (0.40-1.78) | 0.643 |
| High school grade | 0.44 (0.23-0.83) | 0.013 |
| Some college or AA degree | 0.54 (0.30-0.98) | 0.042 |
| College graduate or above | 0.32 (0.16-0.65) | 0.002 |
| Marital status |  |  |
| Married | Ref |  |
| Widowed | 3.33 (1.75-6.32) | <.001 |
| Divorced | 2.26 (1.18-4.33) | 0.015 |
| Separated | 2.43 (0.66-8.91) | 0.173 |
| Never married | 0.90 (0.32-2.49) | 0.832 |
| Living with partner | 1.39 (0.51-3.79) | 0.507 |
| PIR |  |  |
| <1.3 | Ref |  |
| >=1.3 | 0.76 (0.45-1.28) | 0.295 |
| Unknown | 0.80 (0.37-1.72) | 0.561 |
| BMI, kg/m2 |  |  |
| <=24.99 | Ref |  |
| >=25-29.9 | 0.49 (0.25-0.99) | 0.048 |
| >=30 | 1.26 (0.68-2.33) | 0.459 |
| Smoke status |  |  |
| Never | Ref |  |
| Current smoking | 2.09 (1.04-4.19) | 0.040 |
| Quit smoking | 2.04 (1.02-4.08) | 0.045 |
| Hypertension, n (%) |  |  |
| No | Ref |  |
| Yes | 2.02 (0.81-5.02) | 0.128 |
| Diabetes, n (%) |  |  |
| No | Ref |  |
| Yes | 1.88 (1.12-3.16) | 0.019 |
| Dyslipidemia |  |  |
| No | Ref |  |
| Yes | 1.22 (0.64-2.34) | 0.537 |
| CVD, |  |  |
| No | Ref |  |
| Yes | 1.78 (0.94-3.41) | 0.077 |
| Close relative had heart attack |  |  |
| No | Ref |  |
| Yes | 1.06 (0.52-2.17) | 0.866 |
| CKD, |  |  |
| No | Ref |  |
| Yes | 3.17 (1.70-5.93) | <.001 |
| Cancer |  |  |
| No | Ref |  |
| Yes | 1.14 (0.56-2.31) | 0.711 |
| Chronic bronchitis |  |  |
| No | Ref |  |
| Yes | 1.29 (0.63-2.65) | 0.481 |
| Asthma, |  |  |
| No | Ref |  |
| Yes | 0.56 (0.27-1.16) | 0.114 |
| Intestine problem |  |  |
| No | Ref |  |
| Chronic constipation | 0.27 (0.06-1.15) | 0.074 |
| Chronic diarrhea | 0.59 (0.22-1.63) | 0.299 |
| Segmented neutrophils num | 1.21 (1.09-1.34) | <.001 |
| Lymphocyte number | 1.07 (0.74-1.56) | 0.707 |
| Eosinophils number | 0.92 (0.23-3.68) | 0.902 |
| ALT | 0.99 (0.97-1.01) | 0.450 |
| AST | 1.01 (0.99-1.02) | 0.549 |
| Bronchodilator |  |  |
| No | Ref |  |
| Yes | 0.99 (0.44-2.23) | 0.981 |
| ICS |  |  |
| No | Ref |  |
| Yes | 1.56 (0.60-4.05) | 0.355 |

Notes: Ref: reference, HR: hazard ratio, CI: confidence interval, AA: associate of arts, PIR: poverty income ratio, BMI: body mass index, CVD: cardiovascular disease, CKD: chronic kidney disease, ALT: Alanine aminotransferase, AST: Aspartate aminotransferase, ICS: inhaled corticosteroids.

Supplementary Table 2 Multiple collinearity test

| Variables | VIF |
| --- | --- |
| Log (CAR*100) | 2.70 |
| Education level | 1.28 |
| Marital Status | 1.62 |
| BMI | 1.82 |
| Smoke status | 1.32 |
| Diabetes | 1.05 |
| CKD | 1.47 |
| Segmented neutrophils num | 1.19 |

Note: VIF: variance expansion factor, CAR: C-reactive protein (CRP) to albumin (ALB) ratio, BMI: body mass index, CKD: chronic kidney disease, VIF values <5 indicate no collinearity.

Supplementary Table 3 The cut-off values of CAR in predicting the mortality in COPD patients

| Indicators | 1-year mortality | 3-year mortality | 5-year mortality |
| --- | --- | --- | --- |
| Cut-off | 0.987 | 0.967 | 0.934 |

Notes: CAR, C-reactive protein (CRP) to albumin (ALB) ratio; COPD, chronic obstructive pulmonary disease.

Supplementary Table 4 The significance of the AUC differences between models for different years

| Indicator | 1--year VS. 3-year | 1-year VS. 5-year | 3-year VS. 5-year |
| --- | --- | --- | --- |
| *P* | 0.06052 | 0.01834 | 0.7613 |

Notes: AUC: area under the curve; VS.: versus. A P value of less than 0.05 indicated a significantly difference.
